# Supplementary material
Source: publisher figshare collection journal article supplement (https://acs.figshare.com/ndownloader/files/4195627)
Supplement: Supplementary file 1 [file 4195627]

*Supporting Information Cover Sheet*

**Naturally Occurring Contamination in the Mancos Shale**

Stan J. Morrison,<sup>1,2</sup> Craig S. Goodknight,<sup>2</sup> Aaron D. Tigar,<sup>2</sup>  
Richard P. Bush,<sup>3</sup> and April Gil<sup>3</sup>

<sup>1</sup>Corresponding author phone: (970) 248-6373; fax (970) 248-7628; email  
Stan.Morrison@lm.doe.gov.

<sup>2</sup>Environmental Sciences Laboratory, 2597 Legacy Way, Grand Junction, Colorado 81503;  
Operated by SM Stoller for the U.S. Department of Energy Office of Legacy Management.

<sup>3</sup>U.S. Department of Energy Office of Legacy Management, 2597 Legacy Way, Grand  
Junction, Colorado 81503.

Prepared December 29, 2011: *Environmental Science & Technology*

Number of pages: 19

Number of tables: 2

Number of figures: 12

## “Natural Contamination” Defined

We use “natural contamination” to mean a process by which constituents are transferred from geologic materials (in this case, rock of the Mancos Shale) to groundwater in concentrations that could be harmful to human health or the environment. For this definition, the source of the groundwater may be anthropogenic, but the water must be of high quality prior to contacting the geologic source of the natural contamination. Contaminants are considered to be constituents with concentrations that exceeded regulated standards; uranium, selenium, and nitrate were notable because their concentrations commonly exceeded standards by more than 10-fold. Additional results and discussion for this project are presented in the DOE report (1).

## Geology

**Mancos Shale Geology in the Study Regions.** Mancos Shale nomenclature varies significantly across the Colorado Plateau in the six study regions, as shown in Figure S1. In general, during marine transgressions, shale, mudstone, claystone, and limestone were deposited, whereas sandstone was typically deposited during regressions. Bordering the Western Interior Seaway on the west was the Sevier orogenic belt. As thrusting in the orogenic belt progressed eastward, the west part of the seaway filled, and the sea migrated to eastern Colorado and adjoining states, depositing Pierre Shale.

| Eastern Colorado Area (Generalized) |                     |                            | Grand Junction and Montrose Colorado Regions |                         | Shiprock New Mexico Region |                         | Green River Utah Region     |                        | Price Utah Region |                         | Hanksville Utah Region |              |                        |
|-------------------------------------|---------------------|----------------------------|----------------------------------------------|-------------------------|----------------------------|-------------------------|-----------------------------|------------------------|-------------------|-------------------------|------------------------|--------------|------------------------|
| Fox Hills Sandstone                 |                     |                            | Mesaverde Group                              | Castlegate Sandstone    | Mesaverde Group            | Point Lookout Sandstone | Mesaverde Group             | Sego Sandstone         | Mesaverde Group   | Blackhawk Formation     | Mesaverde Formation    |              |                        |
| Colorado Group                      | Pierre Shale        | Hygiene Sandstone Member   | Mancos Shale                                 | Lujane Point Shale Unit | Mancos Shale               | Cortez Member           | Buck Tongue of Mancos Shale |                        | Mancos Shale      | Star Point Sandstone    | Mancos Shale           | Masuk Member |                        |
|                                     |                     | Sharon Springs Member      |                                              | Sharon Springs Member   |                            |                         |                             |                        |                   |                         |                        |              |                        |
|                                     | Niobrara Formation  | Smoky Hill Member          |                                              | Prairie Canyon Member   |                            | Smoky Hill Member       | Castlegate Sandstone        | Upper Blue Gate Member |                   | Emery Sandstone Member  |                        |              |                        |
|                                     |                     | Fort Hays Limestone Member |                                              | Smoky Hill Member       |                            | Tocito Sandstone Lentil |                             |                        |                   | Lower Blue Gate Member  |                        |              | Emery Sandstone Member |
|                                     |                     |                            |                                              | Montezuma Valley Member |                            | Juana Lopez Member      |                             |                        |                   | Ferron Sandstone Member |                        |              | Blue Gate Member       |
| Benton Formation                    | Carlile Shale       | Bridge Creek Member        | Blue Hill Member                             | Bridge Creek Member     | Juana Lopez Member         | Tununk Member           | Ferron Sandstone Member     | Blue Gate Member       |                   |                         |                        |              |                        |
|                                     | Greenhorn Limestone | Graneros Member            | Graneros Member                              | Graneros Member         | Tununk Member              |                         | Ferron Sandstone Member     | Blue Gate Member       |                   |                         |                        |              |                        |
|                                     | Graneros Shale      |                            |                                              |                         |                            |                         | Ferron Sandstone Member     | Tununk Member          |                   |                         |                        |              |                        |
| Dakota Sandstone                    |                     |                            | Dakota Sandstone                             |                         | Dakota Sandstone           |                         | Dakota Sandstone            |                        | Dakota Sandstone  |                         | Dakota Sandstone       |              |                        |

**FIGURE S1. Mancos Shale nomenclature for the six sampled regions and eastern Colorado.**

**Other Black Shale Provinces.** In the eastern U.S., a similar depositional environment to that of the Mancos Shale occurred in the shallow epicontinental Appalachian sea during Devonian time. The black shales of the Marcellus Formation and the Chattanooga Shale were deposited in this seaway and may contribute to natural contamination of groundwater similar to that of the Mancos Shale. It would be of value to investigate the occurrence of natural contamination in these other black shale terranes.

## Sampling Locations

The following sections contain descriptions of some of the sampling locations within each of the six study regions. The regions and sampling locations are shown in Figure S2. Coordinates and descriptions of all sampling locations are provided in Table S1.

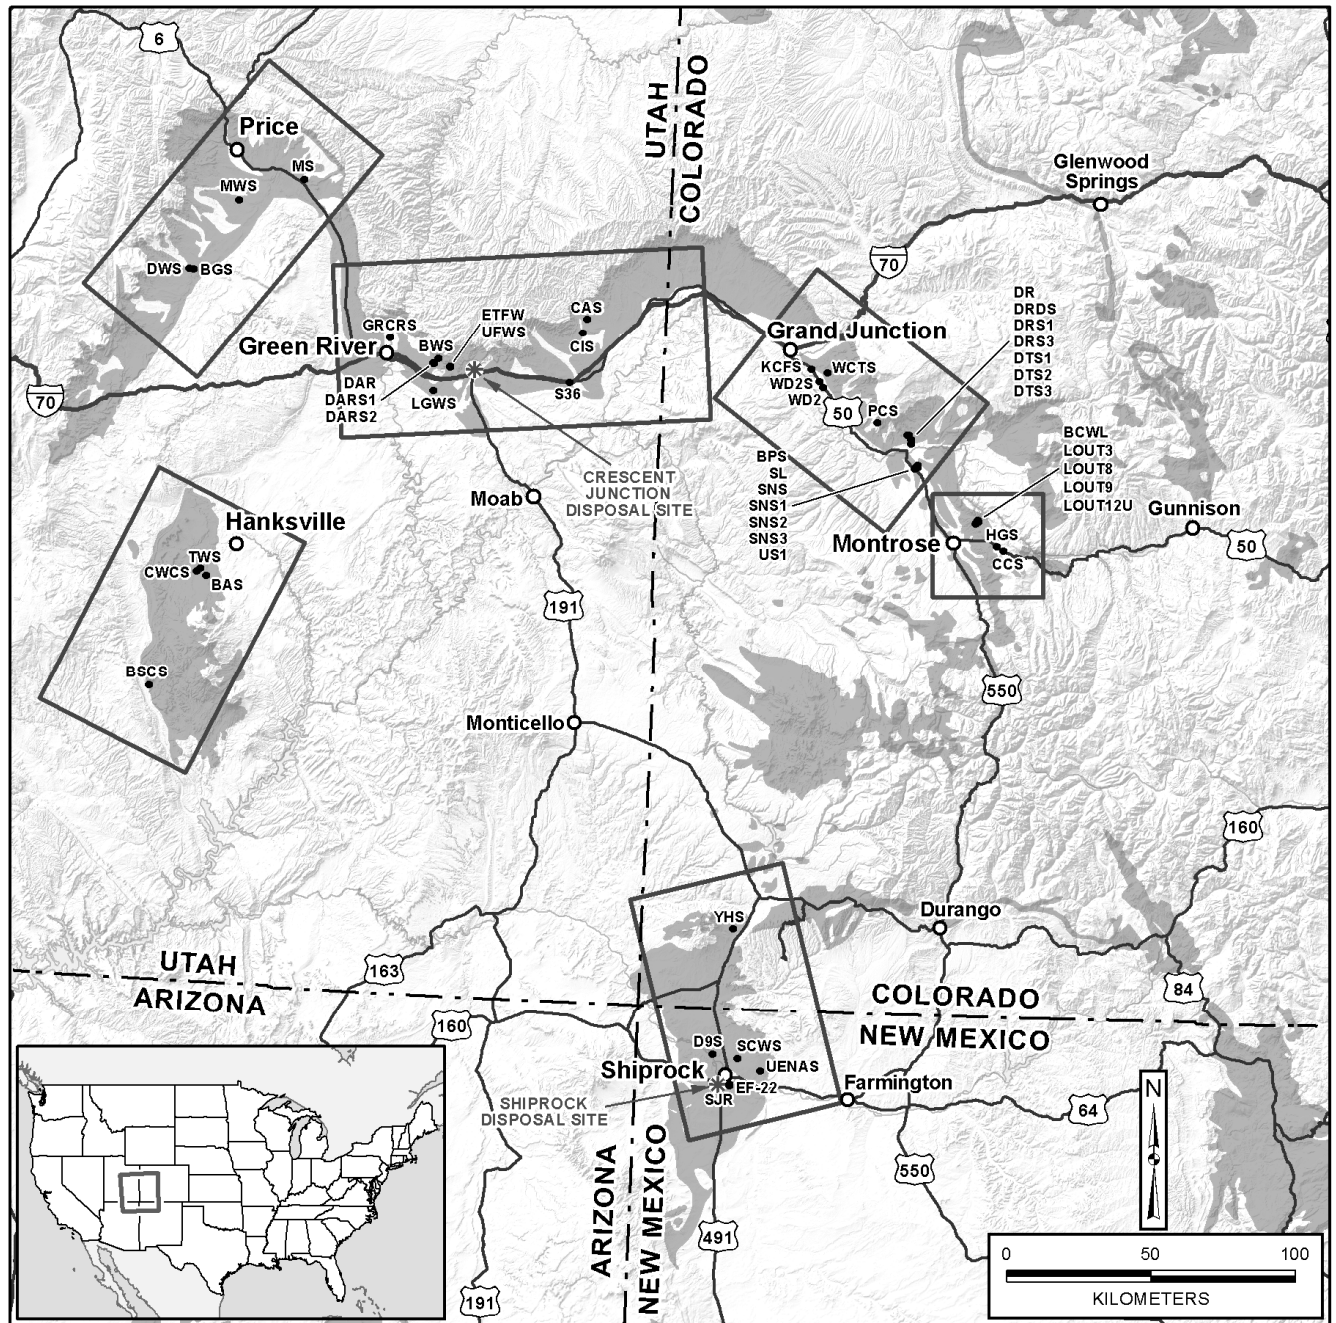

**FIGURE S2. Sampling regions (rectangles), sampling locations (dots), and Mancos Shale outcrop (dark shade).**

**Grand Junction, Colorado, Region.** Sampling locations in the Delta Reservoir area are shown in Figures S3 and S4. Delta Reservoir (DR) occupies 1.3 hectares and is fed by pristine water from highlands of the nearby Grand Mesa. Seepage through the reservoir dam was sampled 40 m downgradient at DRDS. Seeps DRS1 and DRS3 are about 440 m hydraulically downgradient of the reservoir. To reach the seeps, groundwater in the Mancos Shale beneath Delta Reservoir migrates laterally through fractures and along bentonite beds.

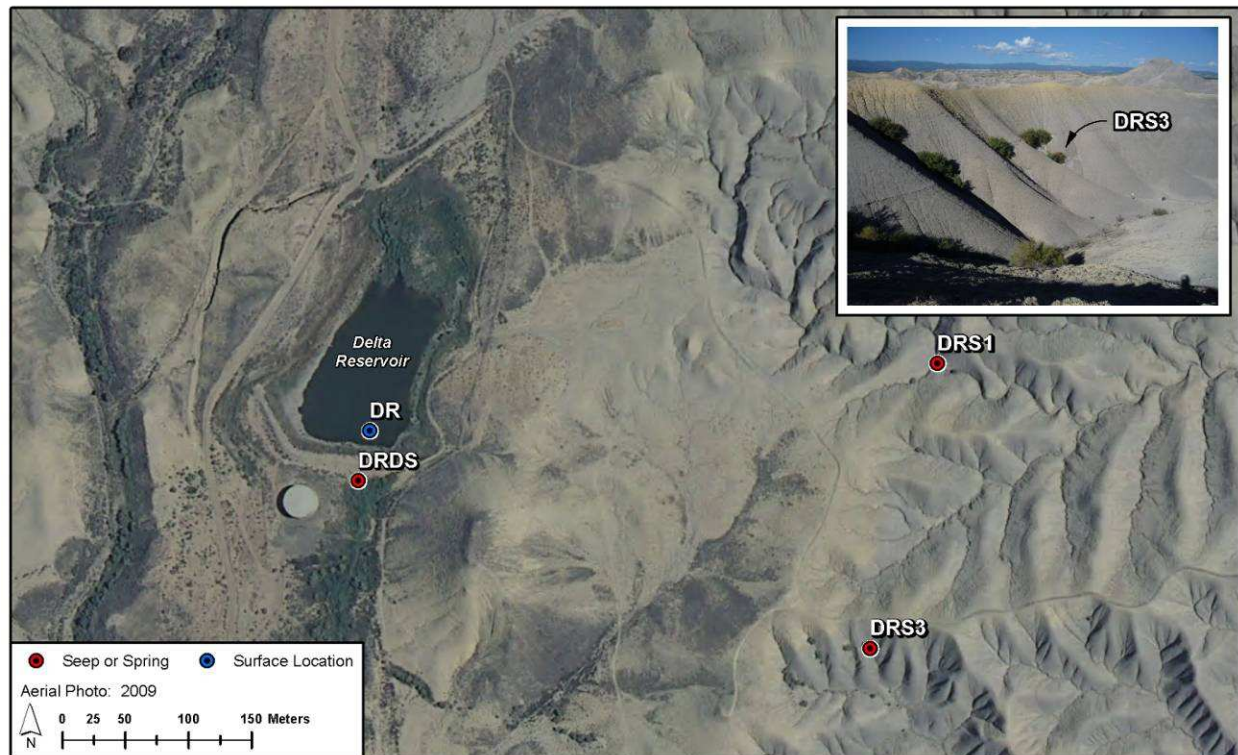

**FIGURE S3.** Sampling locations in the north part of the Delta Reservoir area. Inset is a photo of DRS3 Seep.



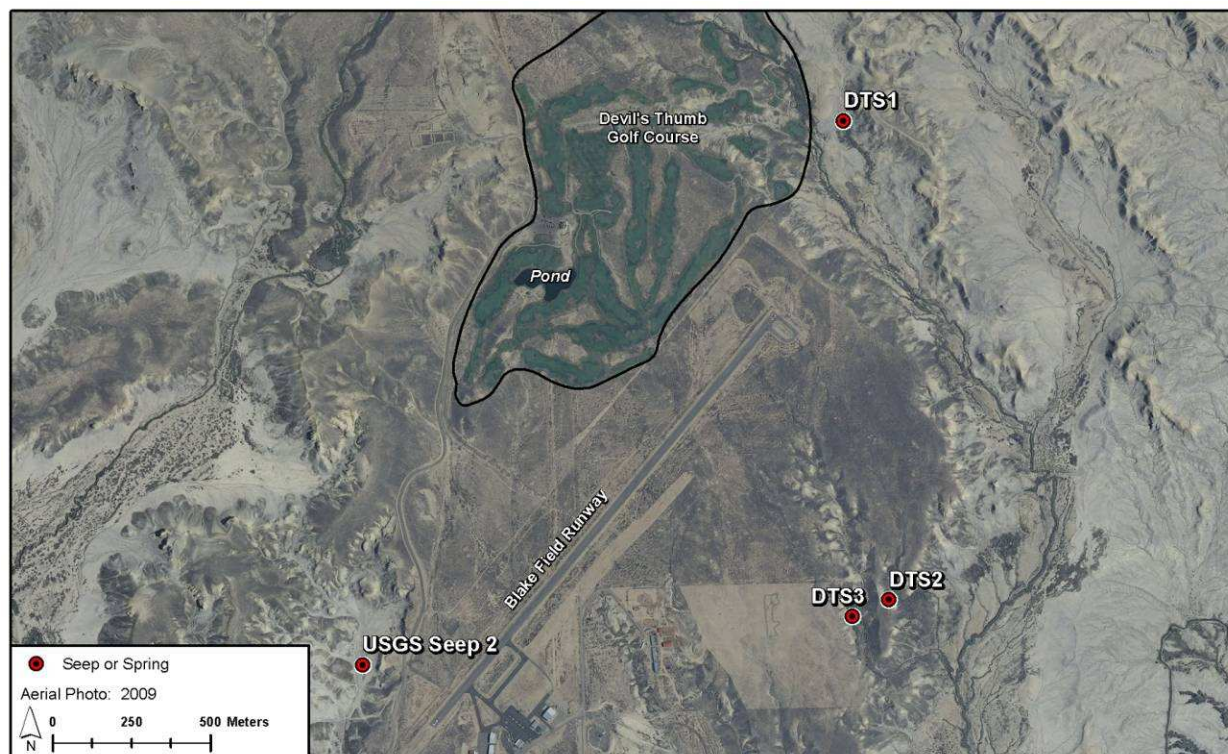

**FIGURE S4. Sampling locations and location of USGS Seep 2 in the south part of the Delta Reservoir area around Devil's Thumb Golf Course.**

Water is conveyed 1.6 km through a pipe from Delta Reservoir to ponds on the Devil's Thumb Golf Course. Shortly after the golf course ponds were filled, groundwater seeps appeared in nearby areas such as USGS Seep 2, DTS1, DTS2, and DTS3. In November 2001, U.S. Geological Survey personnel sampled USGS Seep 2 about 1280 m from the golf course ponds (4). Using the time period from the filling of the ponds to the first documented seepage, we estimated a minimum flow velocity through the shale of 2.4 m per day. The pond was later lined, causing the seep to dry up, confirming that the pond was the source of the seep water and that groundwater can move at high velocity through the Mancos.

South of the Delta Reservoir area, Sweitzer Lake (SL) has nearby seeps (BPS, SNS, and SNS3) that flow from Mancos Shale, as shown in Figure S5. Northwest of the Delta Reservoir area, Point Creek Seep (PCS) flows from the Mancos in an isolated area with no nearby surface water.

In the north part of the Grand Junction region around Whitewater (Figure S6), Kannah Creek Flowline Spring (KCFS) emerges from the Mancos and flows into a drainage. Also, water that seeps from the bank (WD2S) of U.S. Highway 50 originates in an irrigation canal (WD2) and migrates about 500 m through the Mancos.



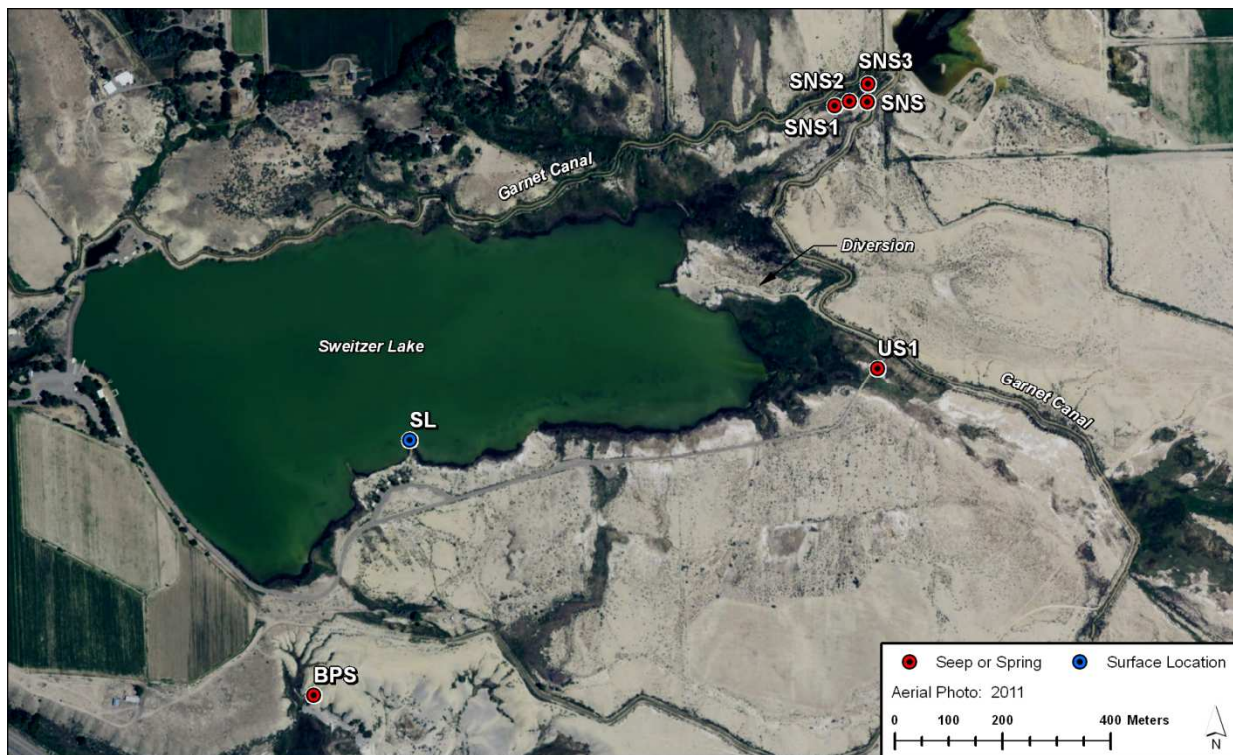

**FIGURE S5. Sampling locations in and near Sweitzer Lake.**

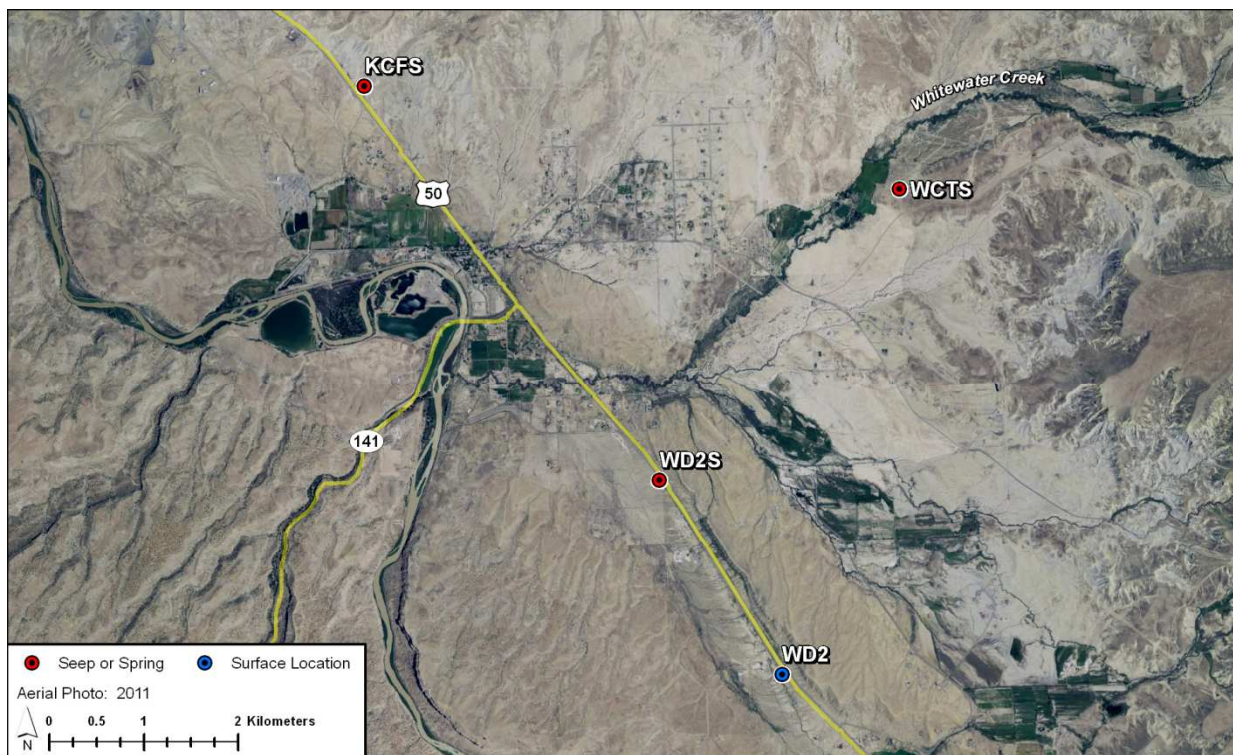

**FIGURE S6. Sampling locations near Whitewater.**

**Green River, Utah, Region.** Groundwater from Cato Springs (CAS) issues from a stream bank underlain by Mancos Shale. Section 36 Seep (S36) is in a drainage containing seepage that originates in the Mancos. Browns Wash Seep (BWS) is in an arroyo bordered by Mancos Shale; seepage is associated with Mancos and alluvium.

Seep LGWS was sampled on the bank of Little Grand Wash and flows from alluvium and Mancos Shale. Green River Canal Return Seep (GRCRS), referred to as SP-3 (5), is on the bank of an irrigation canal. This seep flows from alluvium and Mancos Shale and may be influenced by irrigation

Daly Reservoir (DAR) was built as a range improvement in April 1983. Seeps DARS1 and DARS2 (Figure S7) are fed from the water in DAR and are 70 and 110 m downstream, respectively. These seeps flow from a slope of gray shale in the Mancos into an arroyo.

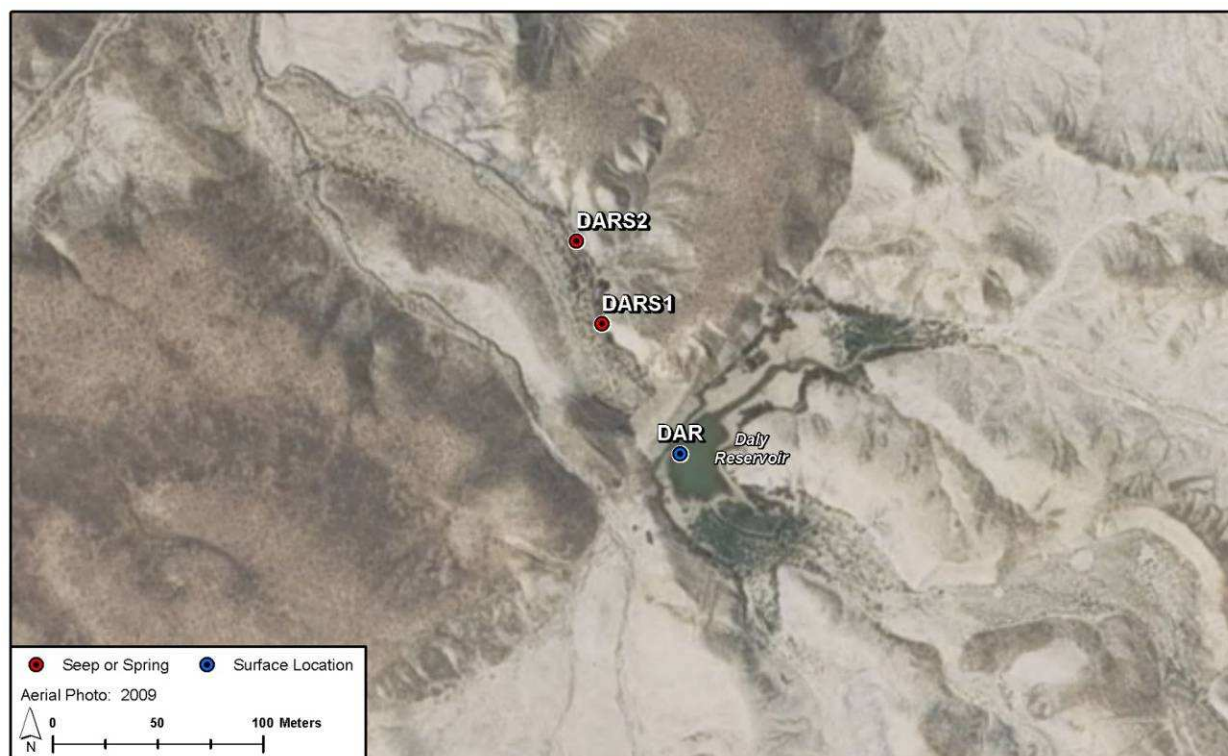

**FIGURE S7. Sampling locations in the Daly Reservoir area.**

**Hanksville, Utah, Region.** Town Wash Spring (TWS), Cottonwood Creek Spring (CWCS), and Bert Avery Spring (BAS) issue from sandstone of the Ferron Sandstone Member of Mancos Shale.

**Montrose, Colorado, Region.** Cedar Creek Seep (CCS) is at the highest-elevation portion of a broad seepage area west of Cerro Summit (Figure S8). At Houston Gulch Seep (HGS), red groundwater seeps from shale of the Mancos.

All seeps with the prefix LOUT are in the Loutsenhizer Arroyo area (Figure S9). Location LOUT8 is at the farthest upstream portion of a seepage area and is referred to as “Lower Seep” by the USGS (4). LOUT9 is another seepage area about 1 km upstream of LOUT8 and is referred to as “Upper Seep” by the USGS (4). LOUT3 and LOUT12U seep from bedded gray shale on a gentle grassy slope and a steep Mancos hillside, respectively. The West Lateral



of Bostwick Canal (BCWL) runs above Loutsenhizer Arroyo in Bostwick Park and is the source of water for the seeps.

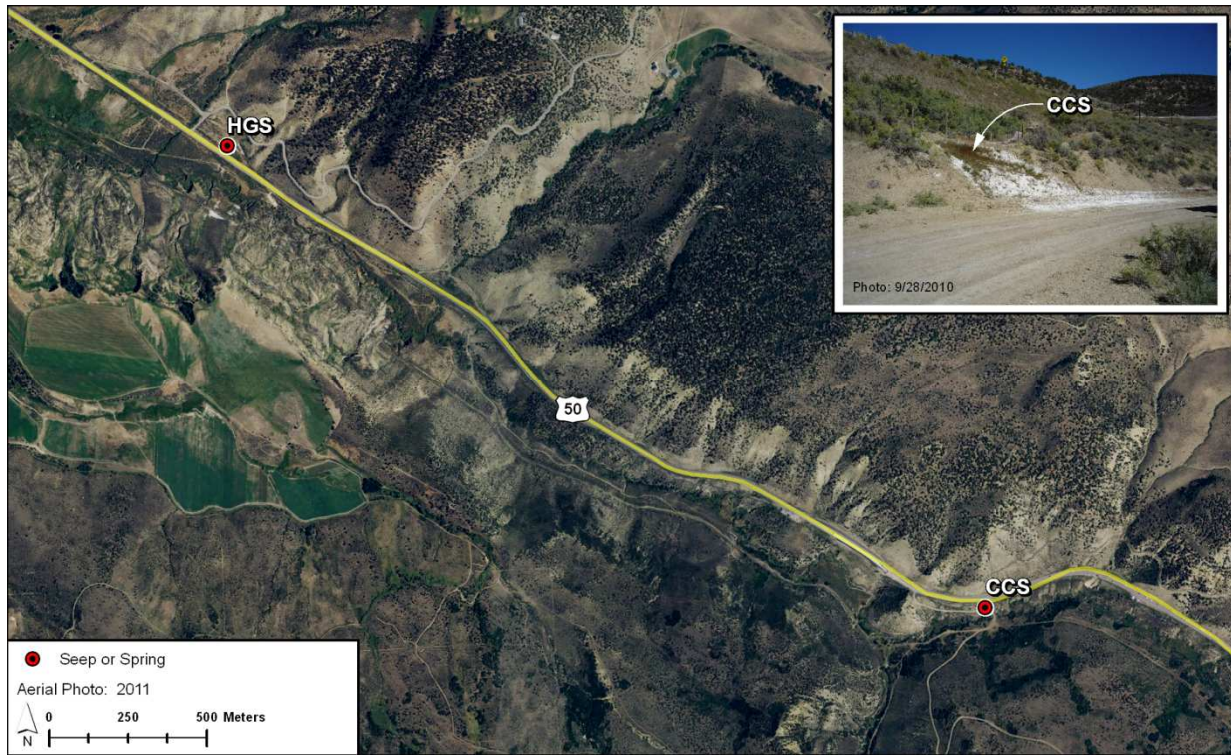

**FIGURE S8. Sampling locations west of Cerro Summit. Inset is a photo of Cedar Creek Seep.**



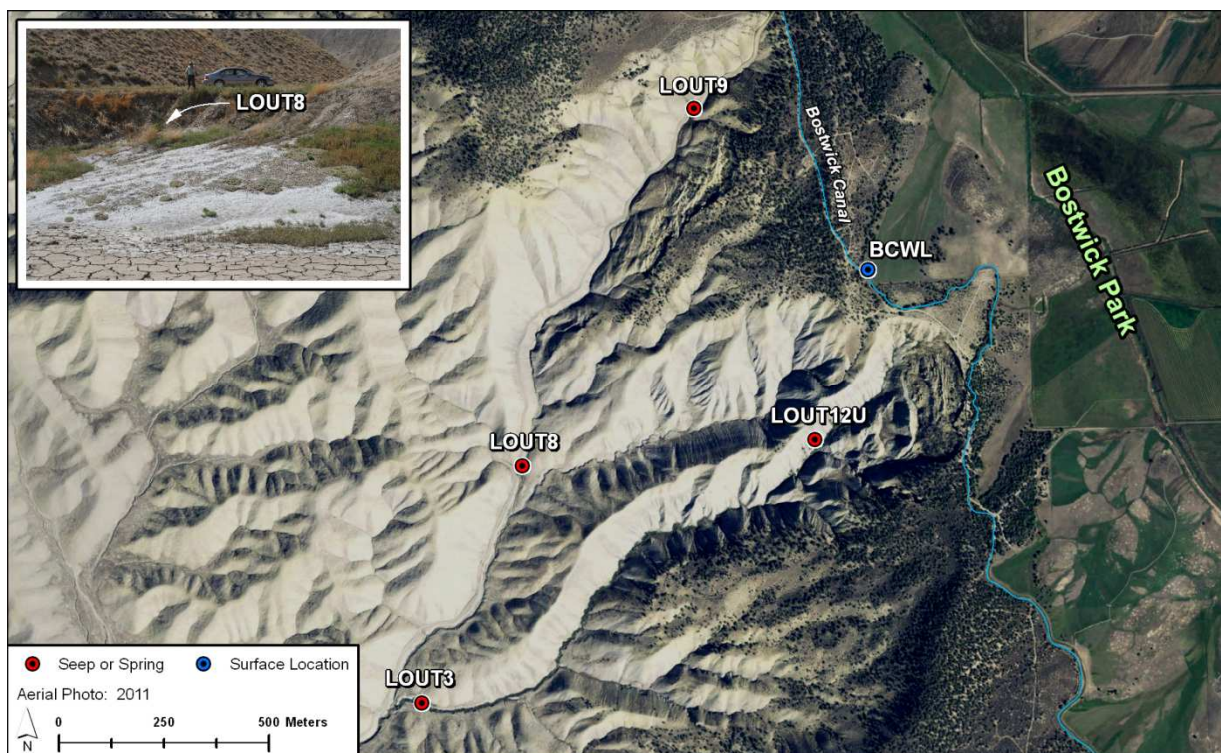

**FIGURE S9. Sampling locations in the Loutsenhizer Arroyo area. Inset is a photo of LOUT8 Seep.**

**Price, Utah, Region.** At Mud Spring (MS), clear water flowing from a vertical pipe is fed by groundwater seepage at the base of an alluvial fan overlying Mancos Shale. Dutchmans Wash Seep (DWS) is in a large, flat area covered by pervasive efflorescence. Blue Gate Spring (BGS) issues from dark gray shale of the Blue Gate Member of the Mancos.

**Shiprock, New Mexico, Region.** Ditch 9 Spring (D9S) is in a marsh along the base of a steep shale hill of Mancos. Salt Creek Wash Seep (SCWS) is at the farthest upstream appearance of seepage in a wash that is incised into Mancos Shale. At Upper Eagle Nest Arroyo, a seep (UENAS) issues from the bank of an arroyo also incised into the Mancos. No apparent sources of surface water are near SCWS or UENAS.

Yucca House Spring (YHS) is in Yucca House National Monument where Wright (6) reported specific conductivity values ranging from 1260 to 2050  $\mu\text{S}/\text{cm}$  and uranium concentrations from 7.46 to 13.1  $\mu\text{g}/\text{L}$  for water sampled four times from September 2002 to September 2003. The spring originates in sandstone of the Juana Lopez Member of the Mancos. During the irrigation season, groundwater is supplemented by water from the Ute Mountain Ditch.

East Fork (EF-22) is in a tributary about 30 m from its confluence with Many Devils Wash. Many Devils Wash is about 0.8 km from DOE's Shiprock uranium mill tailings disposal site, and DOE is responsible for remediating the wash. EF-22 is the only sampling location that is near a known source of anthropogenic uranium contamination. Remediation efforts in Many Devils Wash include construction of a collection drain, surface water catchment dam, and riprap cover downstream of sampling location EF-22. The groundwater system at EF-22 was not affected by the remediation activities. A sample was collected from the San Juan River (SJR) 35 m upstream of the Many Devils Wash confluence.

## Methods

**Notes on Methods, Precision, and Accuracy of Chemical Analyses.** Uranium concentrations were determined by kinetic phosphorescence analysis (KPA), and these values were used for all results and discussions. Uranium isotopes were measured by alpha spectrometry on some samples. Total uranium determined from the alpha spectrometry results provide an independent check on the KPA results. Results from the two methods matched reasonably well. For uranium concentrations more than 20 µg/L, the average difference between KPA and alpha spectrometry was 1.5%, although a few analyses differed by as much as 10% and one was nearly 20%. For uranium concentrations less than 20 µg/L, the concentrations determined by the two methods varied considerably, probably because of the imprecision of the alpha spectrometry with the counting times used (Table S2).

For the ion chromatograph (IC), all samples were analyzed at least twice and many were analyzed three or four times at different dilution factors to ensure concentrations of chloride, nitrate, and sulfate were within the standard curves and to evaluate dilution or interference effects. Also, some samples were run multiple times at the same dilution factor to determine precision. Agreement between dilutions and between duplicate samples was generally within 10%. Standard additions were done on every fifth sample. Recoveries ranged from 95 to 110%. External standards were also analyzed and ranged from 90 to 110%. Most of the dilution factors ranged from 1 to 100 with some at 200 or 500. As an example of analytical precision on a high salinity sample, IC analyses of sulfate on sample HGS gave a relative standard deviation (RSD) of 2.3% for 8 analyses of the same sample. For the IC, external standards were run at the beginning and end of each run and results ranged from 95 to 110%.

Argon chloride (ArCl) is a polyatomic species which can form in the argon plasma of an inductively-coupled-plasma mass spectrometer (ICP-MS) when analyzing high-concentration chloride samples. Because ArCl has the same masses as arsenic (75 amu) and selenium (77 amu), the mass spectrometer can not differentiate between ArCl and the elements of interest. Therefore, high concentrations of chloride can interfere. An Agilent 7700 ICP-MS equipped with a collision cell was used for the analysis. Collision cell ICP-MS is advantageous because it is virtually free of the polyatomic interferences that affect arsenic and selenium analyses. Use of this instrument minimizes chloride interferences. In addition, to ensure removal of interferences, matrix spikes, serial dilutions, and interference check solutions were run. Serial dilution checks were run on six of the samples and all dilutions were within 10% of each other. Replicate precision and duplicate precision were within 10% and calibration verification standards ranged from 90 to 110%.

## Results

**Constituent Concentrations by Sampling Location.** Concentrations of five constituents in groundwater are shown in Figure S10 for 36 of the sampling locations—the locations that had analyses of all five constituents. A comprehensive set of chemical data is provided in Table S2.

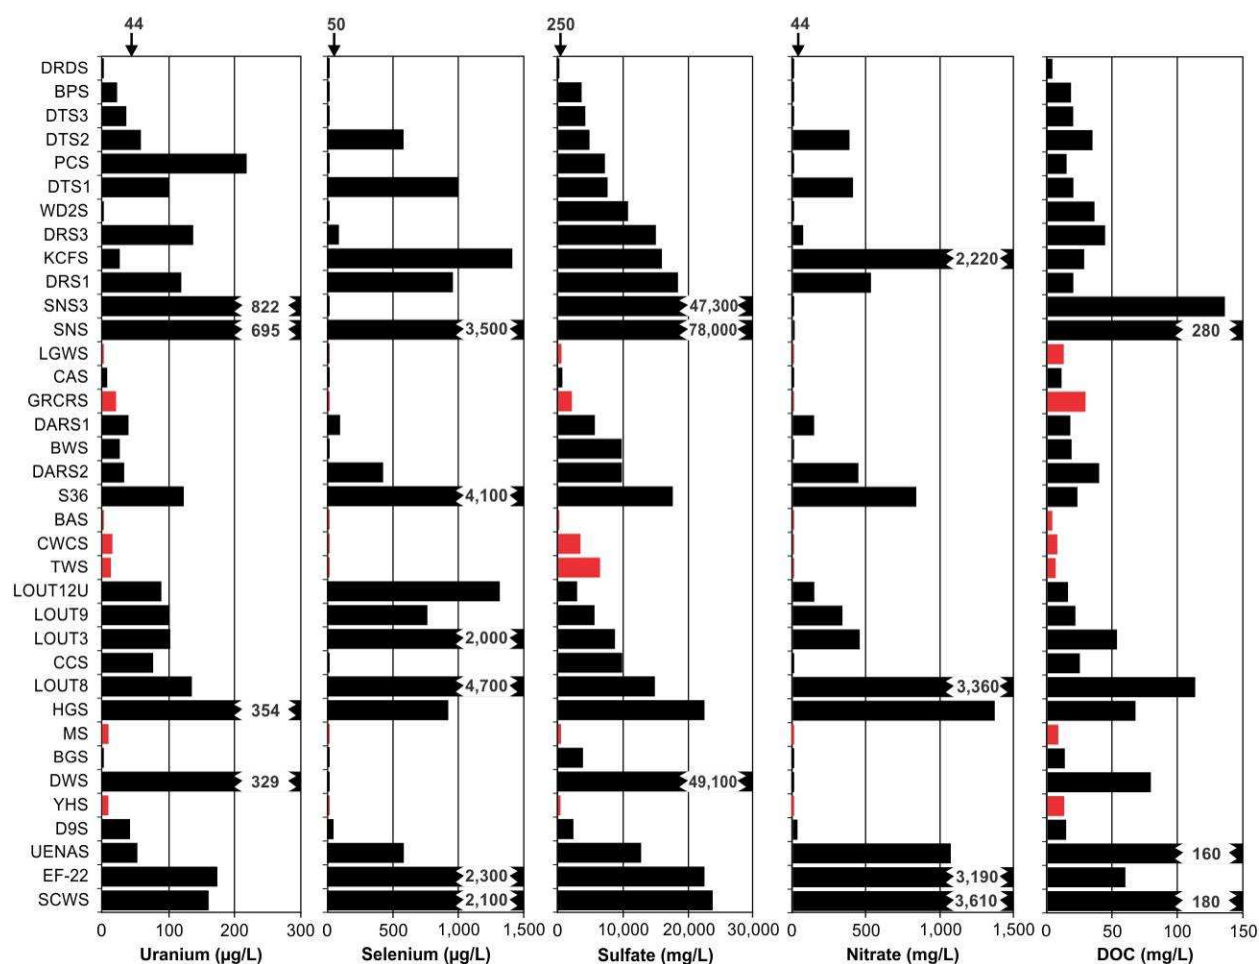

**FIGURE S10. Concentrations of selected chemicals in groundwater samples. Values that exceeded the graph maximums are indicated. Red bars are samples of groundwater from sandstone; all others are from shale. Arrows at top indicate drinking water standards (7).**

**Water Isotopes.** In most cases, seeps were flowing at less than 1 L/min and there was concern that atmospheric exposure during sampling could cause evaporative concentration. Water isotopes were analyzed to help determine if samples had been evaporated prior to or during sampling. Most of the water isotopic signatures plot to the right ( $^{18}\text{O}$  enrichment) of the local meteoric water line (LMWL) for the Colorado Plateau (8) as shown in Figure S11. There was no obvious difference in the water isotopic signatures among samples collected at various sampling rates.

Water samples with specific conductivity values more than 20,000  $\mu\text{S}/\text{cm}$  generally plot farther to the right ( $^{18}\text{O}$  enriched) than those with specific conductivity values less than 20,000  $\mu\text{S}/\text{cm}$  (Figure S11), suggesting that some water samples were affected by evaporation. From these data, we surmise that most of the evaporation signature observed in carefully collected (those that avoided recent surface exposure) groundwater samples occurred during recharge and are representative of in situ Mancos groundwater conditions.

Water from BCWL and seeps in the Loutsenhizer Arroyo area were isotopically lighter than those in other areas (Figure S12). Water in BCWL comes from the Cimarron River draining part of the San Juan Mountains, which receive isotopically light rainout from clouds moving



east. Lighter isotopic signatures are known to occur in high elevation areas from Raleigh fractionation effects (9). The isotopic signature of BCWL is similar to that of the Loutsenhizer Arroyo area seeps, supporting the field observation that BCWL is the source of recharge.

Isotopic signatures in Delta Reservoir and related seeps are light owing to water piped from 3,000 m elevation on Grand Mesa. The similarity of isotopic signatures of Delta Reservoir water and the nearby seeps suggests that the reservoir is the source of the seeps (Figure S12). In contrast, isotopic signatures are heavier in the Daly Reservoir area.

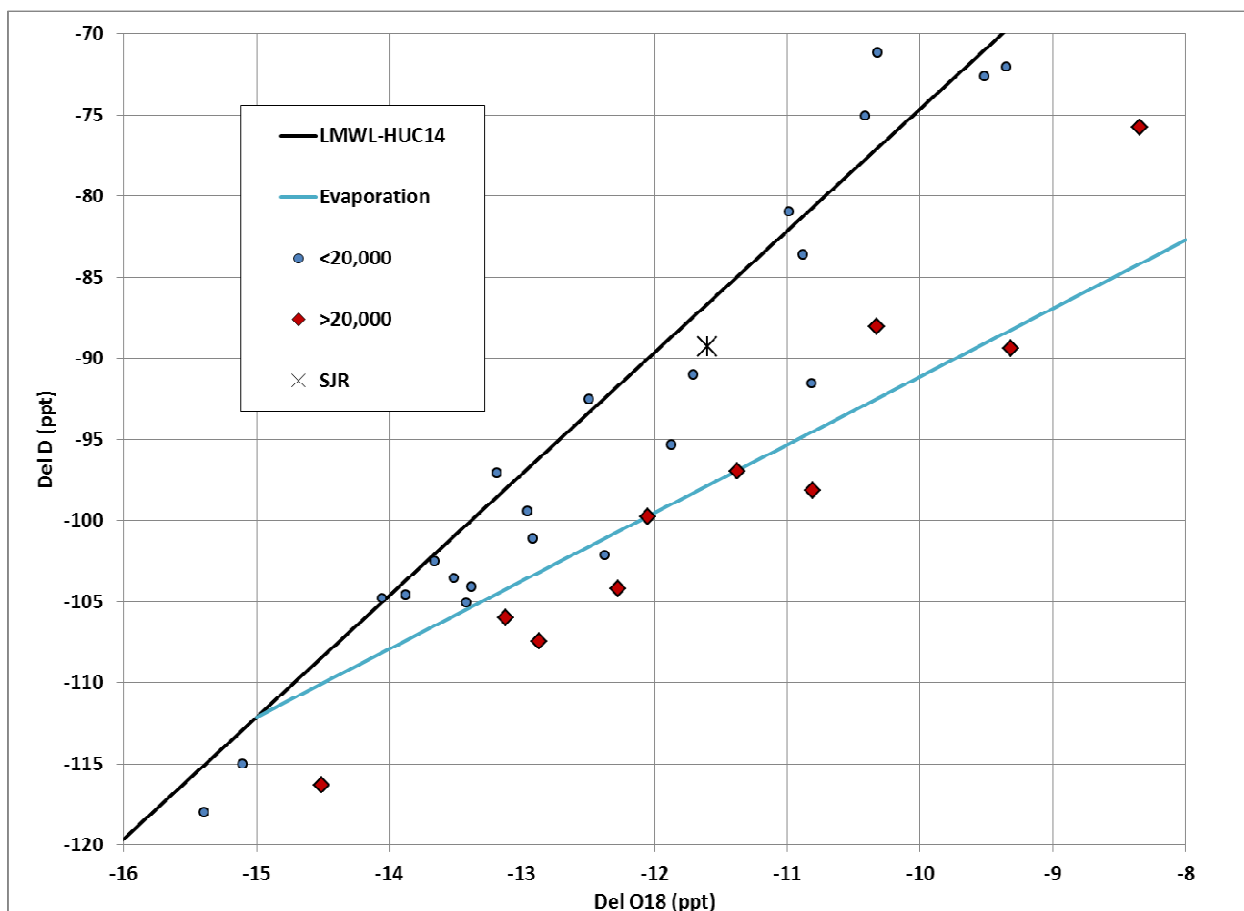

**FIGURE S11.  $\delta^{18}\text{O}$  (Del O18) and  $\delta^2\text{H}$  (Del D) results for groundwater samples. Samples are divided into two groups based on a specific conductivity of 20,000  $\mu\text{S/cm}$ . LMWL-HUC14 = local meteoric water line for Colorado Plateau (8). SJR = San Juan River. ppt = parts per thousand. Evaporation line is drawn for 25% humidity.**

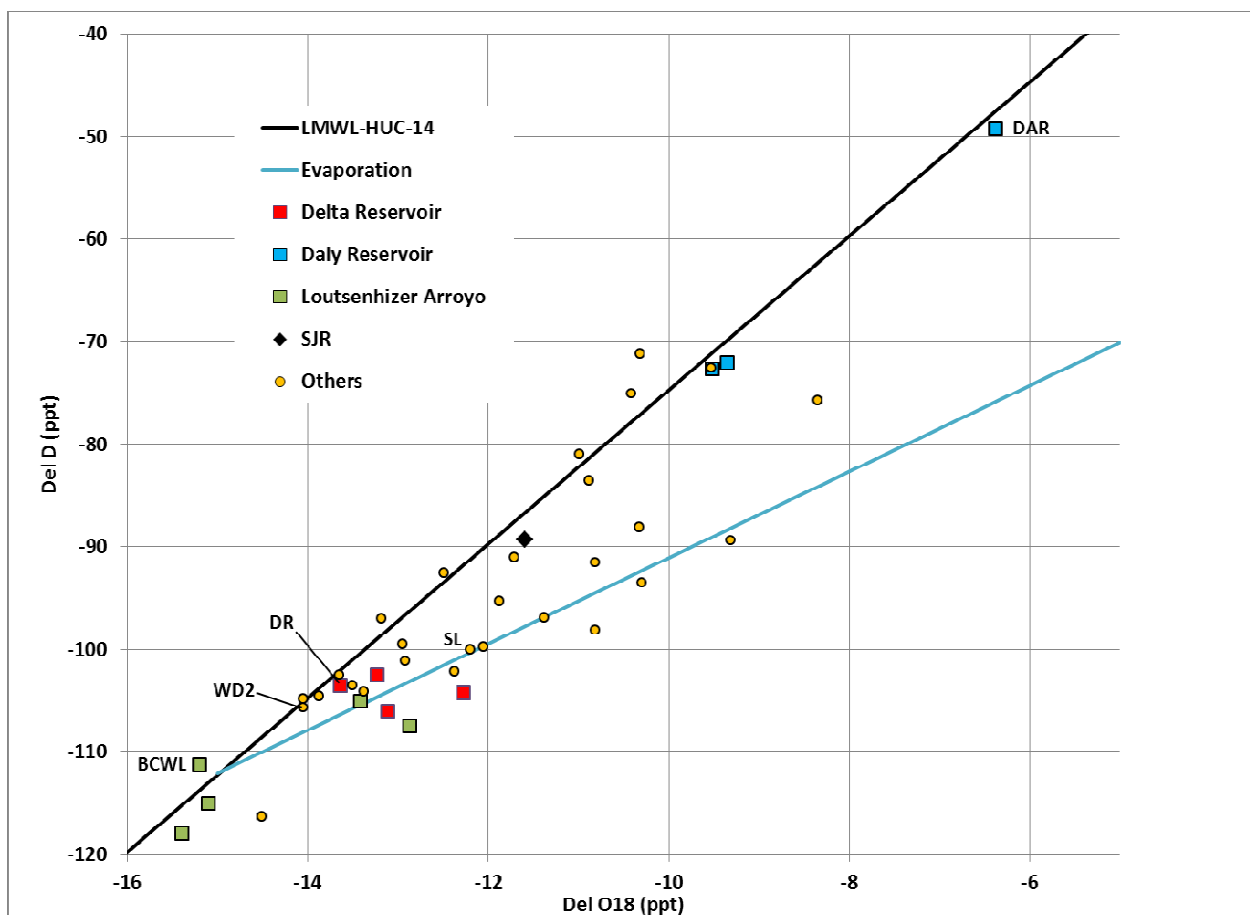

**FIGURE S12.  $\delta^{18}\text{O}$  (Del O18) and  $\delta^2\text{H}$  (Del D) results. Surface water samples are labeled, all others are seeps. Samples are color coded by sampling area. LMWL-HUC14 = local meteoric water line for Colorado Plateau. SJR = San Juan River. ppt = parts per thousand. Evaporation line is drawn for 25% humidity.**

**TABLE S1. Sampling Location Data**

## Seeps and Springs

| No. | Location                      | ID    | Latitude    | Longitude    | USGS Site No.   | Geologic Unit*         | Region         | Area            |
|-----|-------------------------------|-------|-------------|--------------|-----------------|------------------------|----------------|-----------------|
| 1   | Bert Avery Spring             | BAS   | 38.26847466 | -110.8225768 | 381603110491901 | Ferron Sandstone       | Hanksville     |                 |
| 2   | Blue Gate Spring              | BGS   | 39.2207617  | -110.9513918 | 391315110570301 | Blue Gate              | Price          |                 |
| 3   | Buen Pastor Spring            | BPS   | 38.70697125 | -108.0353522 |                 | middle Smoky Hill      | Grand Junction |                 |
| 4   | Bitter Spring Creek Spring    | BSCS  | 37.91682206 | -111.0217921 | 375458111011901 | Emery Sandstone        | Hanksville     |                 |
| 5   | Browns Wash Seep              | BWS   | 38.98516015 | -109.9522626 | 385906109570601 | Upper Blue Gate        | Green River    |                 |
| 6   | Cato Springs                  | CAS   | 39.13246669 | -109.3674558 | 390758109220201 | Upper Blue Gate        | Green River    |                 |
| 7   | Cedar Creek Seep              | CCS   | 38.458021   | -107.673677  |                 | upper or middle Mancos | Montrose       |                 |
| 8   | Cisco Springs                 | CIS   | 39.08870947 | -109.3822425 | 390519109230001 | Prairie Canyon         | Green River    |                 |
| 9   | Cottonwood Creek Spring       | CWCS  | 38.27976    | -110.861307  | 381639110513801 | Ferron Sandstone       | Hanksville     |                 |
| 10  | Ditch 9 Spring                | D9S   | 36.85511911 | -108.7483559 |                 | Cortez                 | Shiprock       |                 |
| 11  | Daly Reservoir Spring 1       | DARS1 | 38.97021006 | -109.9710173 |                 | upper Prairie Canyon   | Green River    | Daly Reservoir  |
| 12  | Daly Reservoir Spring 2       | DARS2 | 38.97056543 | -109.9711552 |                 | upper Prairie Canyon   | Green River    | Daly Reservoir  |
| 13  | Delta Reservoir Dam Spring    | DRDS  | 38.809687   | -108.069081  |                 | Prairie Canyon         | Grand Junction | Delta Reservoir |
| 14  | Delta Reservoir Seep 1        | DRS1  | 38.810393   | -108.063758  |                 | Prairie Canyon         | Grand Junction | Delta Reservoir |
| 15  | Delta Reservoir Seep 3        | DRS3  | 38.808375   | -108.064455  |                 | Prairie Canyon         | Grand Junction | Delta Reservoir |
| 16  | Devil's Thumb Seep 1          | DTS1  | 38.79759965 | -108.0544136 |                 | upper Smoky Hill       | Grand Junction | Delta Reservoir |
| 17  | Devil's Thumb Seep 2          | DTS2  | 38.78388498 | -108.053317  |                 | middle Smoky Hill      | Grand Junction | Delta Reservoir |
| 18  | Devil's Thumb Seep 3          | DTS3  | 38.78344064 | -108.0546702 |                 | middle Smoky Hill      | Grand Junction | Delta Reservoir |
| 19  | Dutchmans Wash Seep           | DWS   | 39.22153704 | -110.9688968 |                 | Blue Gate              | Price          |                 |
| 20  | EF-22 Seep                    | EF-22 | 36.759505   | -108.678292  |                 | Cortez                 | Shiprock       |                 |
| 21  | East Tributary Floy Wash      | ETFW  | 38.96177    | -109.904612  |                 | upper Blue Gate        | Green River    |                 |
| 22  | Green River Canal Return Seep | GRCRS | 39.04252778 | -110.1511944 | 390233110090401 | upper Blue Gate        | Green River    |                 |
| 23  | Houston Gulch Seep            | HGS   | 38.471966   | -107.700601  |                 | upper or middle        | Montrose       |                 |



| No. | Location                        | ID      | Latitude    | Longitude    | USGS Site No.   | Geologic Unit*         | Region         | Area                |
|-----|---------------------------------|---------|-------------|--------------|-----------------|------------------------|----------------|---------------------|
|     |                                 |         |             |              |                 | Mancos                 |                |                     |
| 24  | Kannah Creek Flowline Spring    | KCFS    | 39.006019   | -108.462288  |                 | lower Smoky Hill       | Grand Junction |                     |
| 25  | Little Grand Wash Seep          | LGWS    | 38.88477648 | -109.9658041 |                 | lower Blue Gate        | Green River    |                     |
| 26  | Loutsenhizer 12 Upper           | LOUT12U | 38.545237   | -107.776984  |                 | upper or middle Mancos | Montrose       | Loutsenhizer Arroyo |
| 27  | Loutsenhizer 3                  | LOUT3   | 38.5399     | -107.787952  |                 | upper or middle Mancos | Montrose       | Loutsenhizer Arroyo |
| 28  | Loutsenhizer 8                  | LOUT8   | 38.544899   | -107.784986  | 383242107470401 | upper or middle Mancos | Montrose       | Loutsenhizer Arroyo |
| 29  | Loutsenhizer 9                  | LOUT9   | 38.55241793 | -107.7799697 | 383307107454701 | upper or middle Mancos | Montrose       | Loutsenhizer Arroyo |
| 30  | Mud Spring                      | MS      | 39.51934353 | -110.5325294 | 393103110315901 | middle Mancos          | Price          |                     |
| 31  | Mathis Wash Seep                | MWS     | 39.44309801 | -110.7881307 |                 | Blue Gate              | Price          |                     |
| 32  | Point Creek Seep                | PCS     | 38.84549654 | -108.1921318 | 385043108112901 | upper Prairie Canyon   | Grand Junction |                     |
| 33  | Section 36 Spring               | S36     | 38.93193402 | -109.4255796 |                 | middle Blue Gate       | Green River    |                     |
| 34  | Salt Creek Wash Seep            | SCWS    | 36.84469614 | -108.6501375 |                 | Cortez                 | Shiprock       |                     |
| 35  | Sweitzer NE Seep                | SNS     | 38.71654655 | -108.0231702 |                 | upper Smoky Hill       | Grand Junction |                     |
| 36  | Sweitzer NE Seep 1              | SNS1    | 38.71649529 | -108.0238606 |                 | upper Smoky Hill       | Grand Junction |                     |
| 37  | Sweitzer NE Seep 2              | SNS2    | 38.71656063 | -108.0235525 |                 | upper Smoky Hill       | Grand Junction |                     |
| 38  | Sweitzer NE Seep 3              | SNS3    | 38.71684347 | -108.0231466 |                 | upper Smoky Hill       | Grand Junction |                     |
| 39  | Town Wash Spring                | TWS     | 38.28946022 | -110.84917   | 381721110505401 | Ferron Sandstone       | Hanksville     |                     |
| 40  | Upper Eagle Nest Arroyo Spring  | UENAS   | 36.80853481 | -108.560075  |                 | Cortez                 | Shiprock       |                     |
| 41  | Upper Floy Wash Spring          | UFWS    | 38.96103007 | -109.9056714 | 385738109541901 | upper Blue Gate        | Green River    |                     |
| 42  | USGS Seep 1                     | US1     | 38.71211716 | -108.02314   | **              | upper Smoky Hill       | Grand Junction |                     |
| 43  | Whitewater Creek Tributary Seep | WCTS    | 38.99507784 | -108.3979729 |                 | Smoky Hill             | Grand Junction |                     |
| 44  | Whitewater Ditch No. 2 Seep     | WD2S    | 38.96777266 | -108.4276475 |                 | Blue Hill              | Grand Junction |                     |
| 45  | Yucca House Spring              | YHS     | 37.250161   | -108.686194  | 371500108410801 | Juana Lopez            | Shiprock       |                     |

\* Member of Mancos Shale or position within the Mancos

\*\*Thomas (2)

### Surface Locations

| No. | Location                    | ID   | Latitude    | Longitude    | Geologic Unit*       | Region         | Area                |
|-----|-----------------------------|------|-------------|--------------|----------------------|----------------|---------------------|
| 1   | Bostwick Canal West Lateral | BCWL | 38.54883569 | -107.7753634 | upper Mancos         | Montrose       | Loutsenhizer Arroyo |
| 2   | Daly Reservoir              | DAR  | 38.96965    | -109.970598  | upper Prairie Canyon | Green River    | Daly Reservoir      |
| 3   | Delta Reservoir             | DR   | 38.810042   | -108.068961  | Prairie Canyon       | Grand Junction | Delta Reservoir     |
| 4   | San Juan River              | SJR  | 36.764259   | -108.676992  | Cortez               | Shiprock       |                     |
| 5   | Sweitzer Lake               | SL   | 38.711165   | -108.033135  | upper Smoky Hill     | Grand Junction |                     |
| 6   | Whitewater Ditch No. 2      | WD2  | 38.948979   | -108.413333  | Blue Hill            | Grand Junction |                     |

\*Member of Mancos Shale or position within the Mancos.

### Deep Wells

| No. | Location                | Latitude   | Longitude    | Geologic Unit*  | Region         | Area            | Hole Depth or Screened Interval (m)** |
|-----|-------------------------|------------|--------------|-----------------|----------------|-----------------|---------------------------------------|
| 1   | Crescent Junction 201   | 38.9685639 | -109.8102278 | Lower Blue Gate | Green River    |                 | 91.7                                  |
| 2   | Crescent Junction 202   | 38.9598794 | -109.8099280 | Lower Blue Gate | Green River    |                 | 91.4                                  |
| 3   | Crescent Junction 203   | 38.9668125 | -109.8043174 | Lower Blue Gate | Green River    |                 | 91.7                                  |
| 4   | Crescent Junction 204   | 38.9631214 | -109.8042658 | Lower Blue Gate | Green River    |                 | 91.4                                  |
| 5   | Crescent Junction 205   | 38.9585650 | -109.8029977 | Lower Blue Gate | Green River    |                 | 91.4                                  |
| 6   | Crescent Junction 210   | 38.9667029 | -109.7862156 | Lower Blue Gate | Green River    |                 | 92.0                                  |
| 7   | Shiprock Floodplain 860 | 36.775196  | -108.684971  | Cortez          | Shiprock       |                 | 25.8–26.5                             |
| 8   | Shiprock Floodplain 861 | 36.775218  | -108.684990  | Cortez          | Shiprock       |                 | 41.3–42.1                             |
| 9   | Shiprock Floodplain 862 | 36.772236  | -108.681055  | Cortez          | Shiprock       |                 | 27.1–27.9                             |
| 10  | Shiprock Floodplain 863 | 36.772258  | -108.681063  | Cortez          | Shiprock       |                 | 41.2–41.9                             |
| 11  | Shiprock Terrace 820    | 36.774237  | -108.685650  | Cortez          | Shiprock       |                 | 45.4–46.2                             |
| 12  | Shiprock Terrace 822    | 36.774239  | -108.685686  | Cortez          | Shiprock       |                 | 60.7–61.4                             |
| 13  | Shiprock Terrace 823    | 36.771788  | -108.681681  | Cortez          | Shiprock       |                 | 29.7–30.5                             |
| 14  | Shiprock Terrace 824    | 36.771786  | -108.681646  | Cortez          | Shiprock       |                 | 60.5–61.3                             |
| 15  | Shiprock Terrace 825    | 36.771812  | -108.681660  | Cortez          | Shiprock       |                 | 45.0–45.8                             |
| 16  | Delta Landfill 11 ***   | 38.780934  | -108.061472  | Smoky Hill      | Grand Junction | Delta Reservoir | 57.3–58.8                             |

\*Member of Mancos Shale or position within the Mancos.

\*\*Wells at Crescent Junction are open-hole (not screened).

\*\*\*Golder Associates (3)



TABLE S2. Analytical Data

| No | Location                       | Type | ID      | Sample         | Temp    | pH   | Sp Cond | ORP  | DO     | Alkalinity      | Cl     | NO3    | SO4    | NH3-N  | U      | Fe     | Ca     | Na     | Mg     | K      | DOC    | Color | Se     | As     | B      | V      | 222Rn   | U233+234 | U235    | U238    | Total U | AR   | δ <sup>18</sup> O | δ <sup>2</sup> H |  |
|----|--------------------------------|------|---------|----------------|---------|------|---------|------|--------|-----------------|--------|--------|--------|--------|--------|--------|--------|--------|--------|--------|--------|-------|--------|--------|--------|--------|---------|----------|---------|---------|---------|------|-------------------|------------------|--|
|    |                                |      |         | Date/Time      | (deg C) |      | (µS/cm) | (mV) | (mg/L) | (mg/L as CaCO3) | (mg/L) | (mg/L) | (mg/L) | (mg/L) | (µg/L) | (mg/L) | (mg/L) | (mg/L) | (mg/L) | (mg/L) | (mg/L) |       | (µg/L) | (µg/L) | (µg/L) | (µg/L) | (pCi/L) | (pCi/L)  | (pCi/L) | (pCi/L) | (ug/L)  |      |                   |                  |  |
|    | SEEPS                          |      |         |                |         |      |         |      |        |                 |        |        |        |        |        |        |        |        |        |        |        |       |        |        |        |        |         |          |         |         |         |      |                   |                  |  |
| 1  | Bert Avery Spring              | Seep | BAS     | 11/17/10 14:00 | 10.75   | 7.29 | 418     | -28  | 2.4    | 129             | 11.7   | <0.50  | 67.5   |        | 0.19   | 1.6    | 48     | 26     | 9.8    | 1.4    | 4.4    | 81    | 0.18   | 0.94   | 16     | 0.28   | 144     | <0.284   | 0.246   | 0.322   | 1.08    |      | -10.88            | -83.59           |  |
| 2  | Blue Gate Spring               | Seep | BGS     | 11/16/10 11:30 | 7.68    | 6.87 | 6203    | -30  | 7.2    | 58              | 287    | 2.3    | 3910   |        | <1.0   | 0.57   | 410    | 780    | 400    | 15     | 9.1    | <25   | 0.37   | 0.33   | 860    | 0.16   | 53.0    | 0.637    | <0.159  | <0.0810 | 0.317   |      | -12.38            | -102.17          |  |
| 3  | Buen Pastor Spring             | Seep | BPS     | 11/30/10 14:14 | 4.61    | 7.49 | 5639    | 33   | 7.1    | 365             | 62.3   | 1.9    | 3710   |        | 22.6   | <2.0   | 380    | 1200   | 210    | 16     | 12     | 59    | 3.8    | 0.36   | 570    | 0.37   | 130     | 18.2     | <0.168  | 7.98    | 23.9    | 2.28 | -10.82            | -91.54           |  |
| 4  | Bitter Spring Creek Spring     | Seep | BSCS    | 11/18/10 13:40 | 8.58    | 7.05 | 2037    | 307  | 0.45   |                 |        |        |        |        | 65.3   |        |        |        |        |        |        |       |        |        |        |        |         |          |         |         |         |      |                   |                  |  |
| 5  | Browns Wash Seep               | Seep | BWS     | 11/12/10 10:20 | 4.78    | 7.74 | 10800   | 245  | 2.8    | 359             | 267    | 15.0   | 9850   |        | 26.6   | <1.0   | 470    | 3000   | 720    | 1.2    | 20     | 65    | 25     | 0.48   | 240    | 0.47   | 316     | 16.0     | 0.484   | 8.54    | 25.8    | 1.87 | -10.41            | -75.05           |  |
| 6  | Cato Springs                   | Seep | CAS     | 11/11/10 10:25 | 10.97   | 7.58 | 2184    | -65  | 0.34   | 625             | 21.5   | 1.7    | 762    |        | 7.6    | 2.0    | 73     | 360    | 140    | 3.6    | 11     | 160   | 0.14   | 4.5    | 79     | 0.56   | 417     | 4.25     | <0.0641 | 1.83    | 5.50    | 2.32 | -13.65            | -102.53          |  |
| 7  | Cedar Creek Seep               | Seep | CCS     | 11/3/10 10:30  | 10.85   | 6.55 | 16410   | 228  | 4.3    | 644             | 1430   | 2.9    | 9930   |        | 76.7   | <1.0   | 450    | 3300   | 1000   | 27     | 25     | <25   | 12     | 0.23   | 1200   | <0.15  | 1620    | 38.9     | 1.44    | 23.5    | 70.9    | 1.66 | -13.51            | -103.55          |  |
| 8  | Cisco Springs                  | Seep | CIS     | 11/11/10 12:18 | 9.28    | 7.56 | 3947    | 68   | 1.5    |                 |        |        |        |        | 13.5   |        |        |        |        |        |        |       |        |        |        |        |         |          |         |         |         |      |                   |                  |  |
| 9  | Cottonwood Creek Spring        | Seep | CWCS    | 11/17/10 13:12 | 7.18    | 7.07 | 5965    | -92  | 0.89   | 390             | 137    | 1.7    | 3530   |        | 15.4   | 0.79   | 390    | 870    | 210    | 4.1    | 7.8    | 130   | 1.3    | 0.58   | 320    | 0.54   | 266     | 6.98     | 0.484   | 3.64    | 11.1    | 1.92 | -10.99            | -80.95           |  |
| 10 | Ditch 9 Spring                 | Seep | D9S     | 12/2/10 15:45  | 13.28   | 7.01 | 4045    | 174  | 1.7    | 329             | 33.3   | 38.5   | 2460   |        | 42.0   | <0.20  | 480    | 310    | 200    | 13     | 9.8    | 34    | 54     | 0.20   | 730    | 0.24   | 793     | 30.0     | 0.783   | 14.8    | 44.6    | 2.03 | -12.50            | -92.53           |  |
| 11 | Daly Reservoir Spring 1        | Seep | DARS1   | 11/12/10 11:40 | 14.40   | 7.88 | 9187    | 149  | 0.47   | 305             | 97.4   | 150    | 5730   |        | 39.7   | <0.20  | 360    | 1900   | 250    | 24     | 17     | 200   | 110    | 0.36   | 570    | 0.52   | 715     | 24.9     | 1.12    | 12.5    | 37.9    | 1.99 | -9.51             | -72.65           |  |
| 12 | Daly Reservoir Spring 2        | Seep | DARS2   | 11/12/10 11:40 | 16.06   | 7.71 | 15380   | 124  | 0.8    | 335             | 175    | 449    | 9860   |        | 33.2   | <0.20  | 360    | 3600   | 320    | 34     | 41     | 430   | 400    | 0.37   | 560    | 0.59   | 442     | 22.7     | 0.565   | 11.5    | 34.6    | 1.97 | -9.35             | -72.06           |  |
| 13 | Delta Reservoir Dam Spring     | Seep | DRDS    | 11/8/10 11:44  | 14.58   | 7.97 | 793     | 145  | 5.6    | 101             | 1.1    | 8.2    | 312    |        | 3.2    | <0.20  | 150    | 9.3    | 9.0    | 1.2    | 2.9    | <25   | 0.41   | 1.3    | 24     | 0.66   | 311     | 1.31     | <0.0306 | 1.07    | 3.21    | 1.22 | -13.24            | -102.47          |  |
| 14 | Delta Reservoir Seep 1         | Seep | DRS1    | 11/8/10 14:01  | 10.37   | 7.16 | 27250   | 174  | 1.8    | 925             | 1270   | 534    | 18500  |        | 119    | <1.0   | 380    | 7600   | 600    | 27     | 16     | 170   | 950    | 0.20   | 550    | 0.35   | 233     | 108      | 1.90    | 41.5    | 125     | 2.60 | -12.28            | -104.22          |  |
| 15 | Delta Reservoir Seep 3         | Seep | DRS3    | 11/8/10 15:02  | 15.18   | 7.25 | 22840   | 198  | 3.6    | 1040            | 798    | 76.5   | 15100  |        | 137    | <1.0   | 410    | 5900   | 600    | 35     | 44     | 350   | 100    | 3.0    | 690    | 0.84   | 353     | 98.6     | 3.74    | 47.9    | 145     | 2.06 | -13.12            | -105.99          |  |
| 16 | Devils Thumb Seep 1            | Seep | DTS1    | 12/7/10 10:26  | 1.86    | 7.11 | 13500   | 227  | 1.8    | 407             | 388    | 413    | 7700   |        | 101    | <0.20  | 330    | 3000   | 440    | 20     | 20     | 140   | 990    | 0.26   | 380    | 0.56   | 792     | 69.7     | 1.47    | 30.5    | 91.9    | 2.29 | -13.38            | -104.12          |  |
| 17 | Devils Thumb Seep 2            | Seep | DTS2    | 12/7/10 14:11  | 11.59   | 7.25 | 8724    | 166  | 5.2    | 492             | 387    | 389    | 4900   |        | 58.4   | <0.20  | 420    | 1500   | 440    | 32     | 23     | 180   | 600    | 0.43   | 760    | 1.2    | 208     | 44.9     | 1.26    | 19.1    | 57.7    | 2.35 | -11.88            | -95.32           |  |
| 18 | Devils Thumb Seep 3            | Seep | DTS3    | 12/7/10 12:57  | 8.02    | 6.99 | 6576    | 172  | 0.40   | 338             | 146    | 6.1    | 4270   |        | 36.5   | <0.20  | 390    | 820    | 420    | 18     | 13     | 95    | 12     | 0.24   | 550    | 0.34   | 1050    | 29.5     | 0.693   | 13.9    | 41.9    | 2.12 | -12.92            | -101.11          |  |
| 19 | Dutchmans Wash Seep            | Seep | DWS     | 11/16/10 12:05 | 3.57    | 8.45 | 48520   | 108  | 8.1    | 882             | 1030   | 2.9    | 49100  |        | 329    | <2.0   | 430    | 15000  | 2200   | 72     | 81     | 380   | 10     | 1.2    | 430    | 1.4    | <1.0    | 253      | 5.74    | 101     | 305     | 2.50 | -10.33            | -88.07           |  |
| 20 | EF-22 Seep                     | Seep | EF-22   | 12/2/10 17:02  | 8.15    | 7.45 | 37060   | 230  | 0.57   | 662             | 1920   | 3190   | 22600  |        | 174    | 0.40   | 360    | 9200   | 1300   | 34     | 59     | 210   | 2300   | 0.91   | 510    | 3.3    | 407     | 139      | 2.87    | 57.0    | 172     | 2.44 |                   |                  |  |
| 21 | East Tributary Floy Wash       | Seep | ETFW    | 11/11/10 14:00 | 10.05   | 7.87 | 21320   | 139  | 2.2    |                 |        |        |        |        | 38.1   |        |        |        |        |        |        |       |        |        |        |        |         |          |         |         |         |      |                   |                  |  |
| 22 | Green River Canal Return Seep  | Seep | GRCRS   | 11/12/10 8:32  | 6.92    | 7.24 | 3847    | 191  | 5.6    | 370             | 44.7   | 1.9    | 2210   |        | 21.1   | 0.24   | 530    | 400    | 100    | 7.2    | 28     | 140   | 3.6    | 0.69   | 310    | 0.64   |         | 13.0     | <0.0813 | 7.38    | 22.1    | 1.76 | -11.71            | -91.03           |  |
| 23 | Houston Gulch Seep             | Seep | HGS     | 11/3/10 12:10  | 19.45   | 7.36 | 22790   | 136  | 2.4    | 690             | 102    | 1370   | 22500  | 1      | 354    | <8.0   | 450    | 2600   | 3300   | 47     | 67     | 580   | 890    | 1.8    | 940    | 1.4    | 119     | 201      | 8.97    | 135     | 408     | 1.49 | -14.51            | -116.33          |  |
| 24 | Kannah Creek Flowline Spring   | Seep | KCFS    | 11/2/10 12:00  | 10.90   | 7.22 | 26250   | 221  | 3.3    | 417             | 927    | 2220   | 16000  | 1      | 26.6   | <0.20  | 400    | 7200   | 520    | 36     | 24     | 140   | 1400   | 0.15   | 500    | 0.20   | 544     | 37.1     | 0.744   | 9.09    | 27.5    | 4.08 | -10.81            | -98.17           |  |
| 25 | Little Grand Wash Seep         | Seep | LGWS    | 11/12/10 14:15 | 3.87    | 7.25 | 1637    | 10   | 0.98   | 75              | 20.1   | 9.2    | 616    |        | 1.5    | <0.20  | 160    | 96     | 6.2    | 14     | 12     | 49    | 16     | 0.39   | 41     | 0.62   | <1.0    | 2.02     | <0.157  | 0.895   | 2.75    | 2.26 | -10.32            | -71.18           |  |
| 26 | Loutsenhizer 12 Upper          | Seep | LOUT12U | 11/3/10 15:00  | 13.36   | 6.13 | 5190    | 281  | 6.7    | 310             | 176    | 151    | 3010   |        | 89.1   | <0.40  | 410    | 640    | 230    | 9.9    | 16     | 79    | 1300   | 0.24   | 810    | 0.65   | 452     | 48.3     | 1.48    | 27.2    | 82.0    | 1.78 | -15.39            | -117.96          |  |
| 27 | Loutsenhizer 3                 | Seep | LOUT3   | 11/3/10 17:30  | 11.97   | 7.03 | 15330   | 228  | 2.6    |                 | 818    | 459    | 8820   |        | 103    | <2.0   | 480    | 3700   | 420    | 29     | 53     | 31    | 2000   | 0.66   | 1100   | 3.1    | 107     | 59.8     | 1.97    | 35.0    | 106     | 1.71 | -13.42            | -105.05          |  |
| 28 | Loutsenhizer 8                 | Seep | LOUT8   | 11/4/10 10:15  | 11.74   | 7.91 | 22130   | 250  |        | 428             | 928    | 3360   | 14900  | 1      | 135    | <2.0   | 450    | 6700   | 720    | 37     | 110    | 600   | 4700   | 0.60   | 990    | 1.1    | 433     | 68.5     | 2.08    | 36.6    | 110     | 1.87 | -12.87            | -107.47          |  |
| 29 | Loutsenhizer 9                 | Seep | LOUT9   | 11/4/10 11:15  | 15.65   | 7.54 | 8844    | 197  |        | 633             | 79.0   | 342    | 5700   |        | 102    | <0.40  | 430    | 1200   | 680    | 29     | 21     | 170   | 730    | 0.22   | 1200   | 0.36   | 455     | 58.1     | 2.01    | 34.0    | 103     | 1.71 | -15.10            | -115.00          |  |
| 30 | Mud Spring                     | Seep | MS      | 11/16/10 14:50 | 10.51   | 7.41 | 1650    | 66   | 3.8    | 351             | 52.7   | 3.9    | 553    |        | 9.7    | <0.20  | 72     | 170    | 110    | 1.8    | 5.8    | 71    | 17     | 0.35   | 230    | 2.3    | 947     | 5.65     | <0.0582 | 4.06    | 12.2    | 1.39 | -14.05            | -104.79          |  |
| 31 | Mathis Wash Seep               | Seep | MWS     | 11/16/10 13:35 | 7.69    | 7.77 | 70000   | 255  | 3.0    | 1300            | 3380   | 33.5   | 76900  |        | 480    | 0.53   | 600    | 23000  | 7000   | 14     | 260    | 2000  |        |        |        |        |         |          |         |         |         |      | -9.32             | -89.40           |  |
| 32 | Point Creek Seep               | Seep | PCS     | 11/8/10 8:46   | 9.82    | 7.56 | 10740   | 277  | 2.6    | 610             | 250    | <0.50  | 7280   |        | 218    | <1.0   | 440    | 1700   | 640    | 29     | 15     | 60    | 1.5    | 0.75   | 1400   | 0.24   | 217     | 114      | 2.88    | 72.4    | 218     | 1.57 | -13.88            | -104.59          |  |
| 33 | Section 36 Spring              | Seep | S36     | 11/11/10 14:00 | 12.41   | 7.67 | 24520   | 164  | 2.6    | 479             | 436    | 841    | 17700  |        | 123    | <1.0   | 400    | 6500   | 840    | 24     | 24     | 84    | 4100   | 0.36   | 260    | 0.47   | 256     | 79.2     | 1.13    | 35.9    | 108     | 2.21 | -11.38            | -96.97           |  |
| 34 | Salt Creek Wash Seep           | Seep | SCWS    | 12/7/10 11:33  | 1.97    | 7.39 | 48640   | 238  | 1.6    | 1090            | 7100   | 3610   | 23800  |        | 160    | <0.40  | 450    | 15000  | 1400   | 62     | 180    | 460   | 2100   | 0.68   | 800    | 1.1    | 258     | 150      | 2.58    | 53.3    | 161     | 2.81 |                   |                  |  |
| 35 | Sweitzer NE Seep               | Seep | SNS     | 11/4/10 14:35  | 8.09    | 8.45 | 68110   | 126  |        |                 | 1980   | 18.1   | 78000  | 3      | 695    | <2.0   | 520    | 25000  | 1950   | 45     | 280    | 2600  | 3500   | 12     | 2000   | 19     |         | 468      | 15.0    | 243     | 733     | 1.93 |                   |                  |  |
| 36 | Sweitzer NE Seep 1             | Seep | SNS1    | 11/30/10 11:25 | 3.44    | 7.56 | 53320   | 239  | 1.2    |                 |        |        |        |        | 985    |        |        |        |        |        |        |       |        |        |        |        |         |          |         |         |         |      |                   |                  |  |
| 37 | Sweitzer NE Seep 2             | Seep | SNS2    | 11/30/10 12:18 | 4.23    | 8.30 | 33490   | 197  | 4.4    |                 |        |        |        |        | 1920   |        |        |        |        |        |        |       |        |        |        |        |         |          |         |         |         |      |                   |                  |  |
| 38 | Sweitzer NE Seep 3             | Seep | SNS3    | 11/30/10 11:54 | 2.11    | 7.44 | 55960   | 190  | 0.6    | 1730            | 1590   | 4.1    | 47300  |        | 822    | <2.0   | 480    | 19000  | 2700   | 20     | 130    | 520   | 13     | 5.3    | 3200   | 3.7    | 193     | 489      | 14.4    | 280     | 844     | 1.75 | -12.05            | -99.78           |  |
| 39 | Town Wash Spring               | Seep | TWS     | 11/17/10 11:25 | 3.36    | 7.34 | 10020   | -19  | 1.4    | 293             | 171    | 2.4    | 6520   |        | 13.2   | 0.31   | 370    | 1300   | 700    | 6.2    | 6.6    | 76    | 1.7    | 0.62   | 89     | 0.28   | 221     | 7.34     | 0.354   | 2.61    | 7.97    | 2.81 | -9.52             | -72.55           |  |
| 40 | Upper Eagle Nest Arroyo Spring | Seep | UENAS   | 12/2/10 10:00  | 8.42    | 7.3  | 26610   | 224  | 2.7    | 368             | 4170   | 1070   | 12800  |        | 53.0   | 0.30   | 470    | 5900   | 1000   | 22     | 160    | <25   | 540    | 0.23   | 700    | 0.30   | 403     | 31.3     | 0.794</ |         |         |      |                   |                  |  |

## References for Supporting Information

- (1) DOE (U.S. Department of Energy). *Natural contamination from the Mancos Shale*; Office of Legacy Management, 2011, available on the Internet at <http://www.lm.doe.gov/default.aspx?id=96>
- (2) Thomas, J.C. *Analysis of dissolved selenium loading from surface water and groundwater to Sweitzer Lake, Colorado, 2006–07*; Scientific Investigations Report 2009–5048, U.S. Geological Survey, 2009.
- (3) Golder Associates. *Results of the investigation for the Devil's Thumb area Delta County, Colorado*; Delta County, Delta, Colorado, 2004.
- (4) U.S. Geological Survey National Water Information Service Web Interface, <http://waterdata.usgs.gov/nwis/>.
- (5) Germer, S.J.; Spangler, L.E.; Kimball, B.A.; Wilberg, D.E.; Naftz, D.L. *Hydrology and water quality in the Green River and surrounding agricultural areas near Green River in Emery and Grand Counties, Utah 2004–05*; Scientific Investigations Report 2006–5186, U.S. Geological Survey, 2006.
- (6) Wright, W.G. *Hydrology and geochemistry of Yucca House National Monument and surrounding area, southwestern Colorado*; Hydrological Studies Report 2006–1, Southwest Hydro–Logic, Durango, Colorado, 2006.
- (7) 40 e–CFR 141. U.S. Environmental Protection Agency, National Primary Drinking Water Regulations, *Code of Federal Regulations*, January 31, 2011.
- (8) Kendall, C.; Coplen, T.B. Distribution of oxygen-18 and deuterium in river waters across the United States. *Hydrol. Process.* **2001**, *15*, 1363–1393.
- (9) Clark, I; Fritz, P. *Environmental Isotopes in Hydrogeology*; CRC Press: Boca Raton, FL, 1997.
